# Supplementary material for: Deletion of GSTA4-4 results in increased mitochondrial post-translational modification of proteins by reactive aldehydes following chronic ethanol consumption in mice
Source: PubMed Central journal article supplement — Redox Biol. 2015 Nov 27;7:68–77. doi: 10.1016/j.redox.2015.11.013 (PMC4683459; doi:10.1016/j.redox.2015.11.013), 2015-11-27

## Supplemental Figure S2: Supplemental Tandem MS/MS Spectra

### SV PF peptide adducts identified

#### 1. Cytosolic Arginase acrolein adduct (LGIGKVMEEFYSYLLGR)

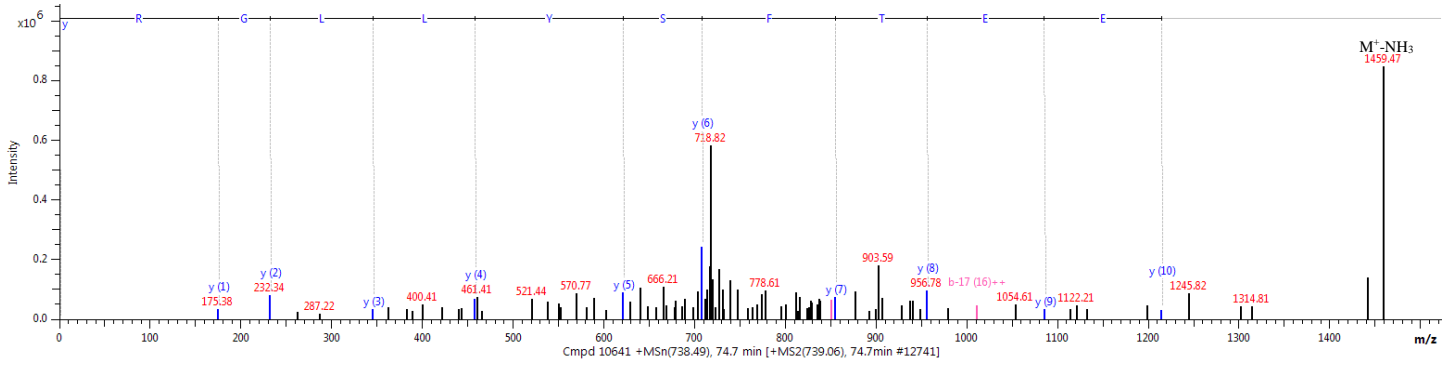

### SV EtOH peptide adducts identified

#### 1. Cytosolic ACOX2 4-ONE adduct (NFKEAVEK)

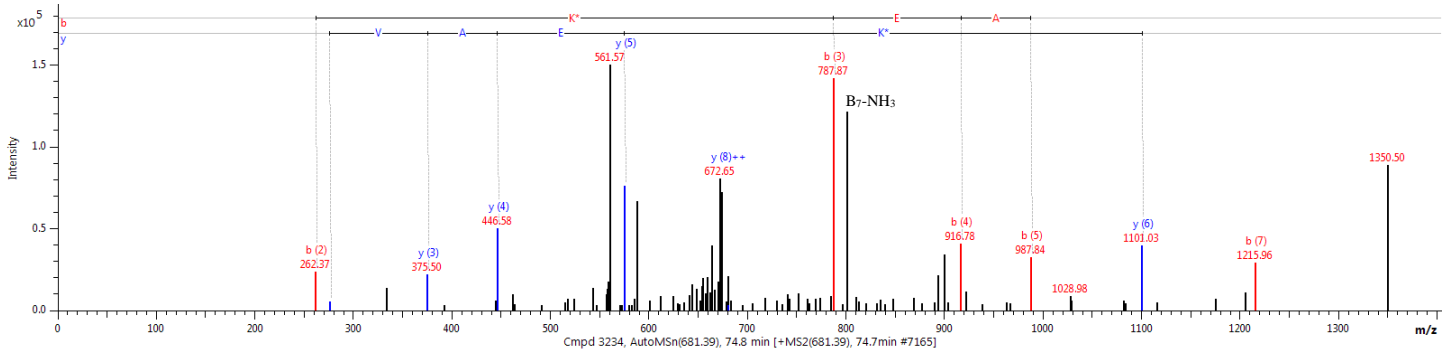

#### 2. Cytosolic Aldolase B hexenaldehyde adduct (KATQEAFMK)

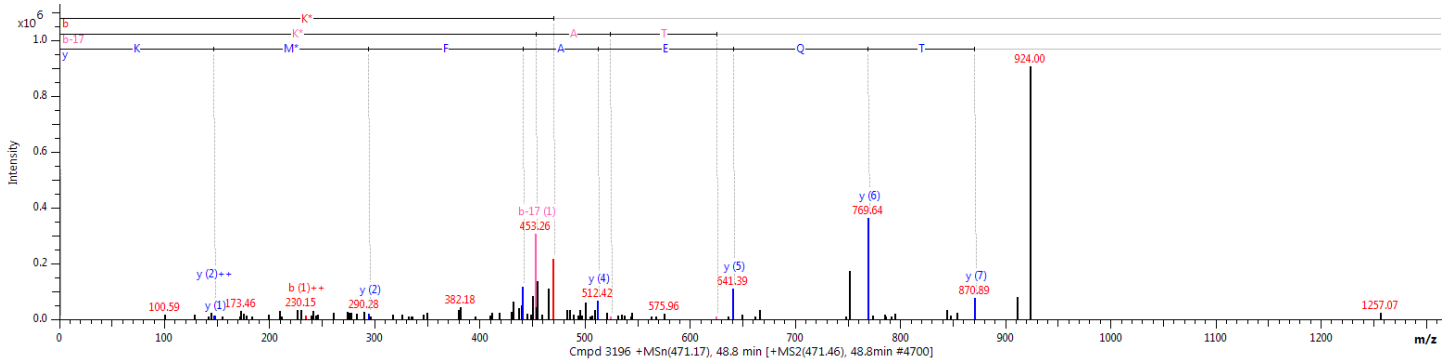

### 3. Cytosolic Caspase 14 MDA adduct (VYIIQACR)

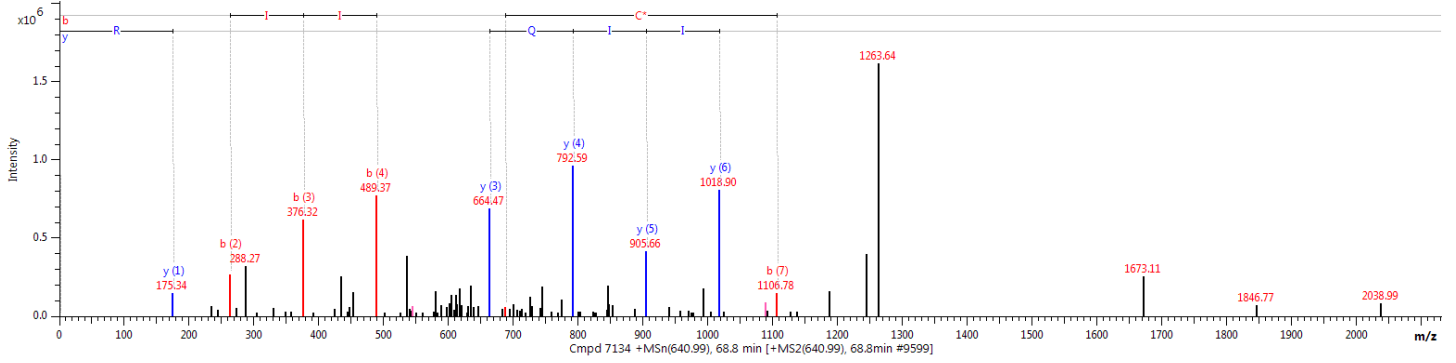

### 4. Cytosolic CX038 acrolein adduct (AGHCLLLR)

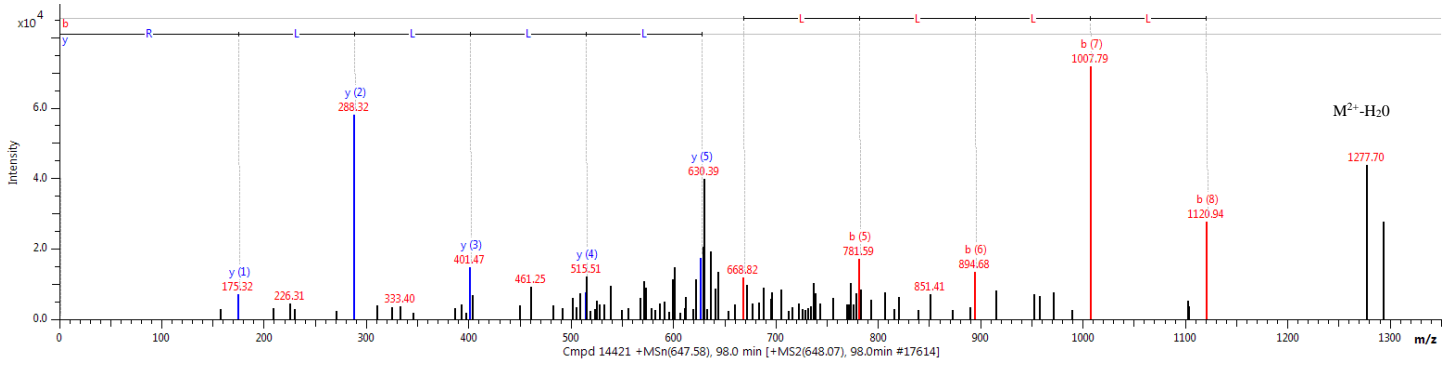

### 5. Cytosolic PYC hexenaldehyde adduct (SKVLKDLPR)

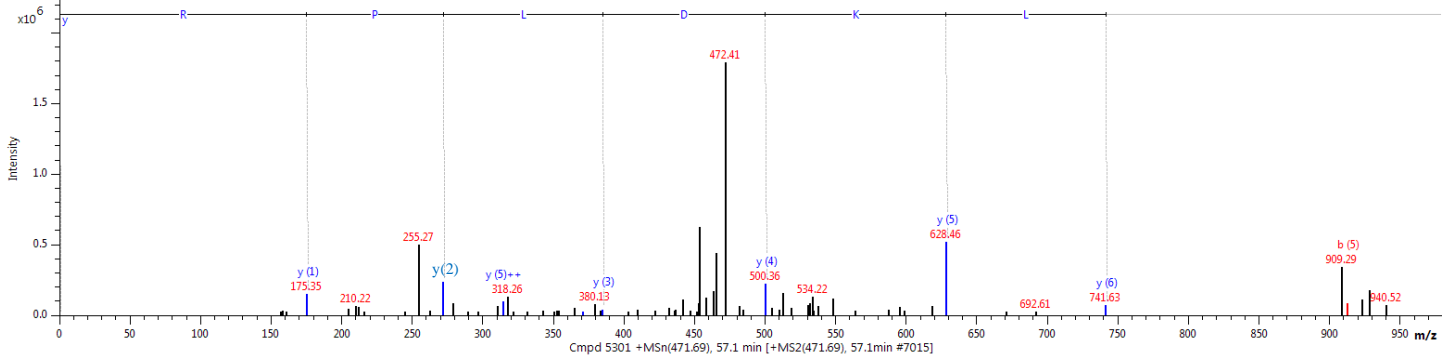

# GSTA4<sup>-/-</sup> PF Peptide Adducts Identified

## 1. Mitochondrial ACSL hexenaldehyde adduct (GEGEVCK)

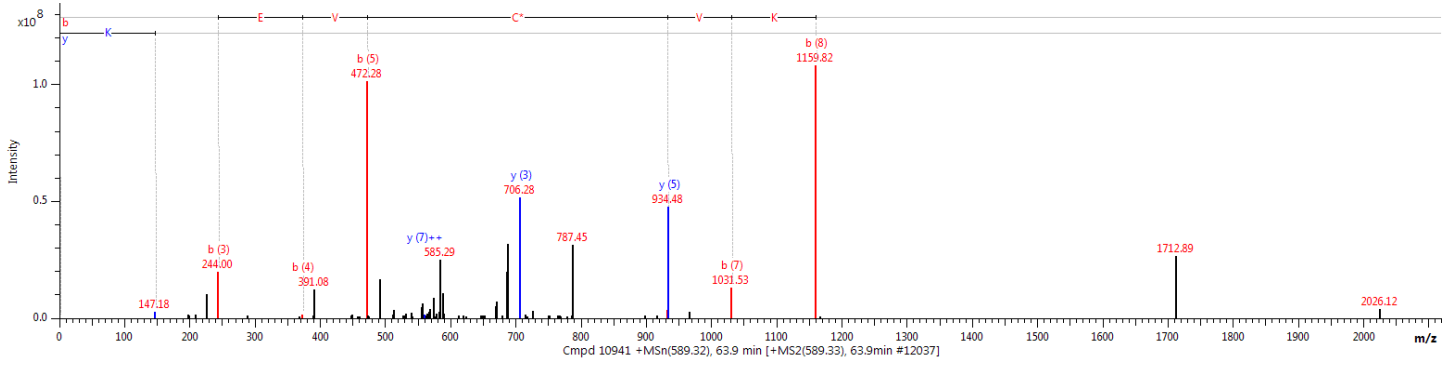

## 2. Cytosolic ACOX2 4-ONE adduct (NFKEAVEK)

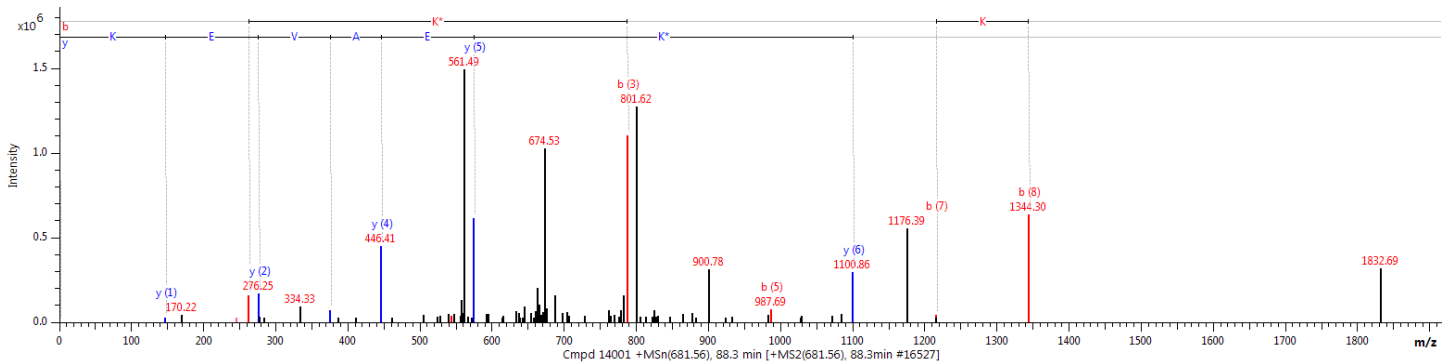

## 3. Mitochondrial ATPA hexenaldehyde adduct (LQKTGTAEMSSILEER)

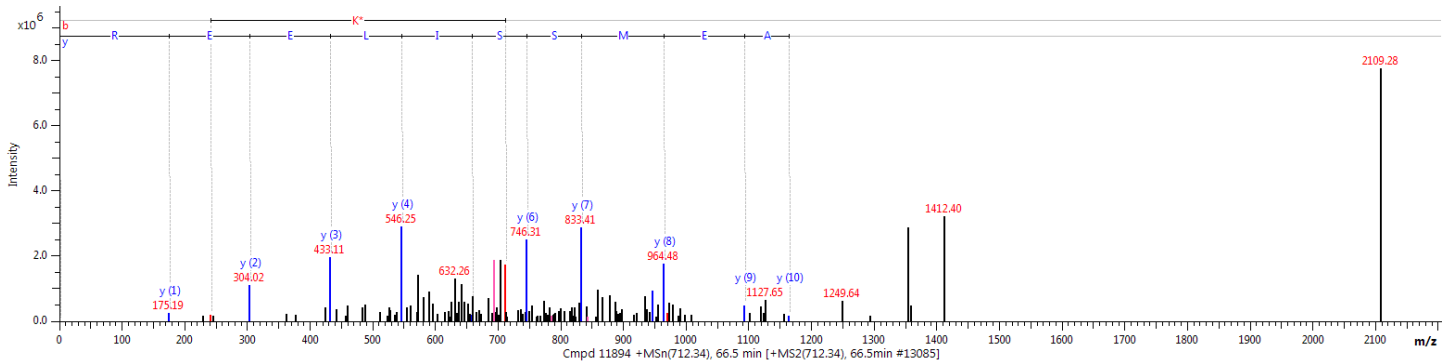

#### 4. Mitochondrial AURKB hexenaldehyde adduct (EIEIQAHLK)

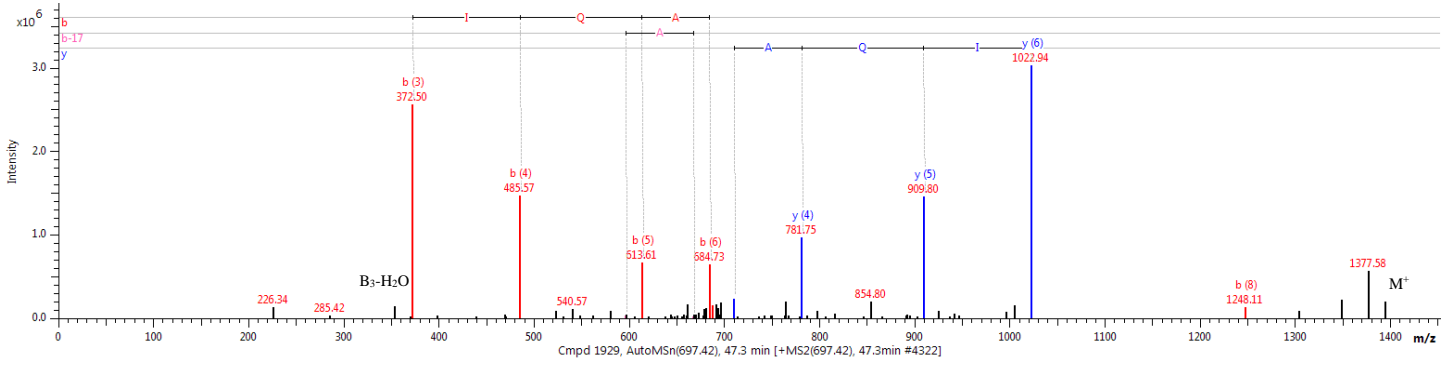

#### 5. Mitochondrial CES1D pentenaldehyde adduct (DKEVFWAELR)

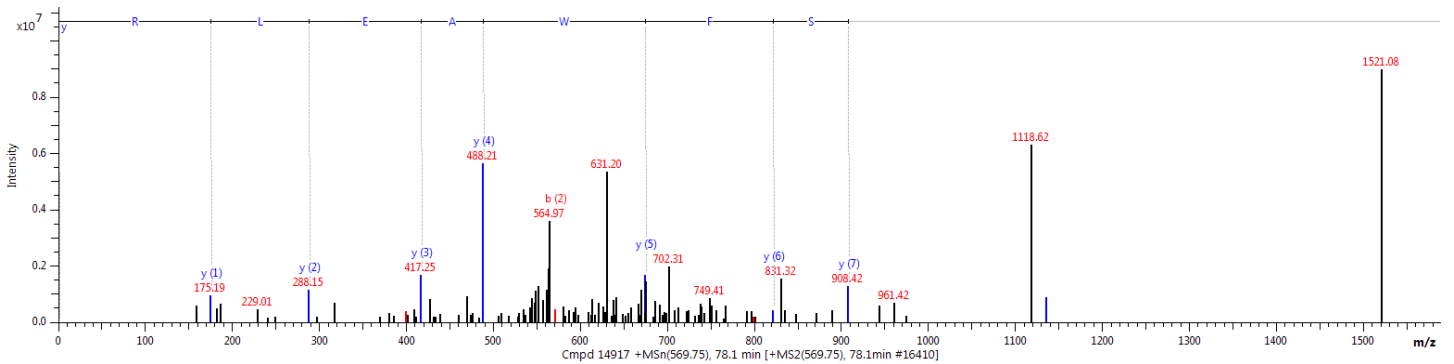

#### 6. Microsomal HLF MDA adduct (CKNILAK)

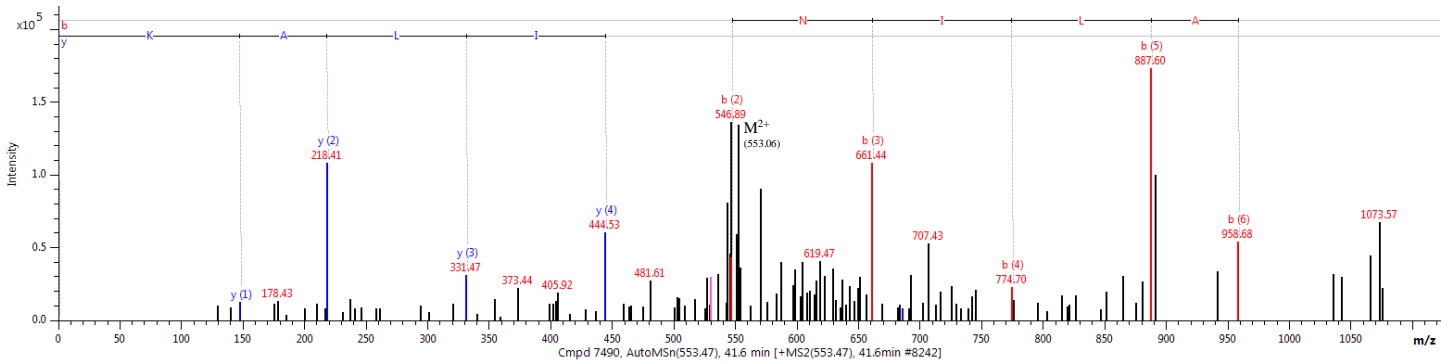

### 7. Mitochondrial K126B crotonaldehyde adduct (CELPSSLK)

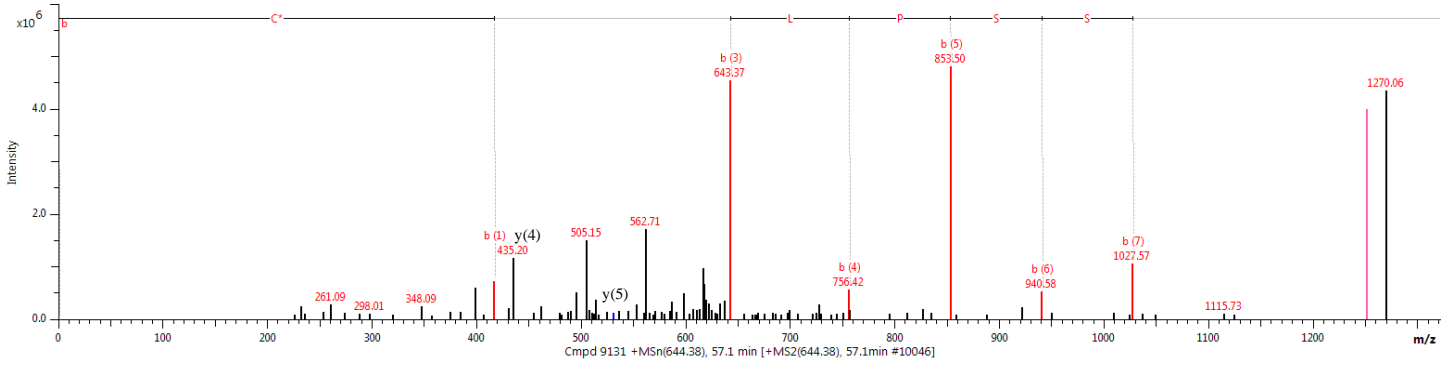

### 8. Mitochondrial P20D1 octenaldehyde adduct (KTMKLLANEFSPINIVLR)

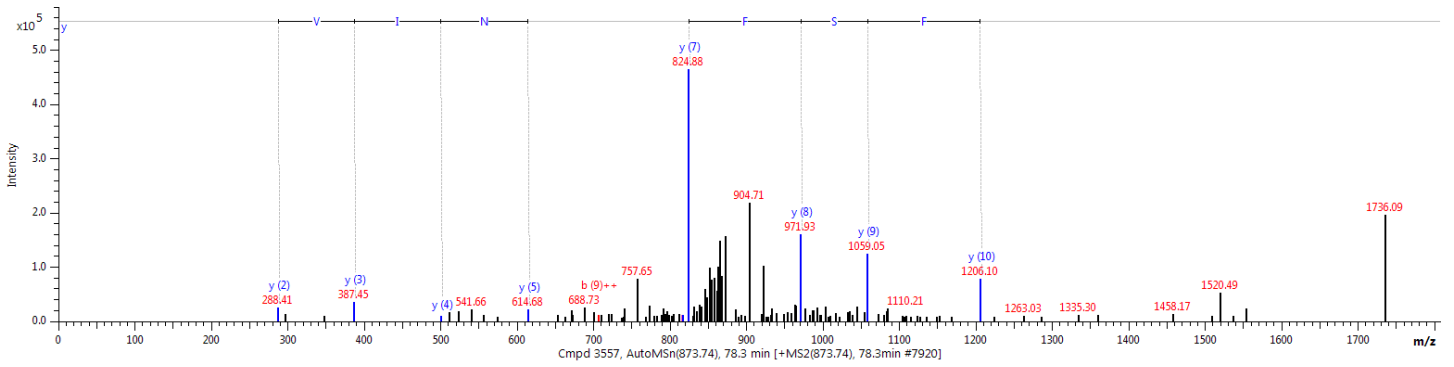

### 9. Mitochondrial TH1KB crotonaldehyde adduct (ASRGCFKDTTPDELLSAVLTAVLQDVK)

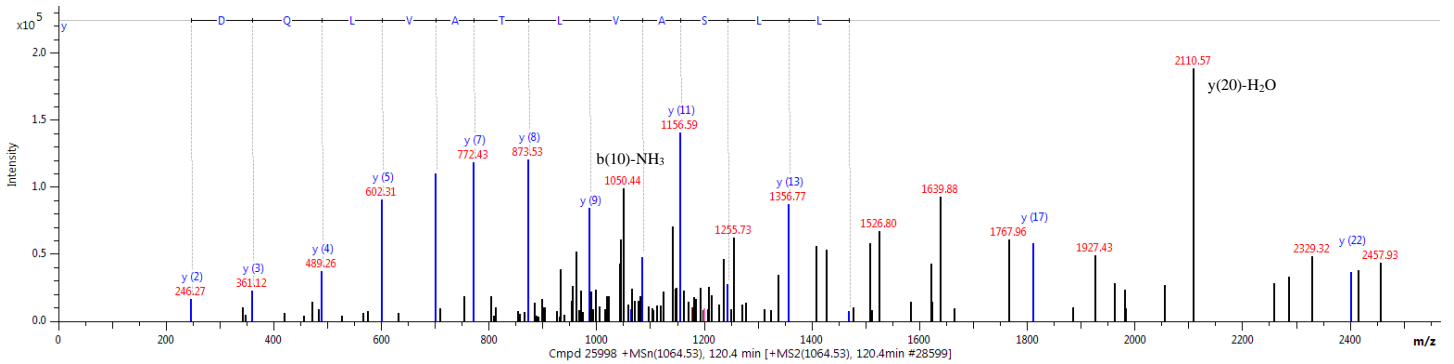

# GSTA4-/- EtOH peptide adducts identified

## 1. Mitochondrial ACSL HHE adduct (GEGEVCK)

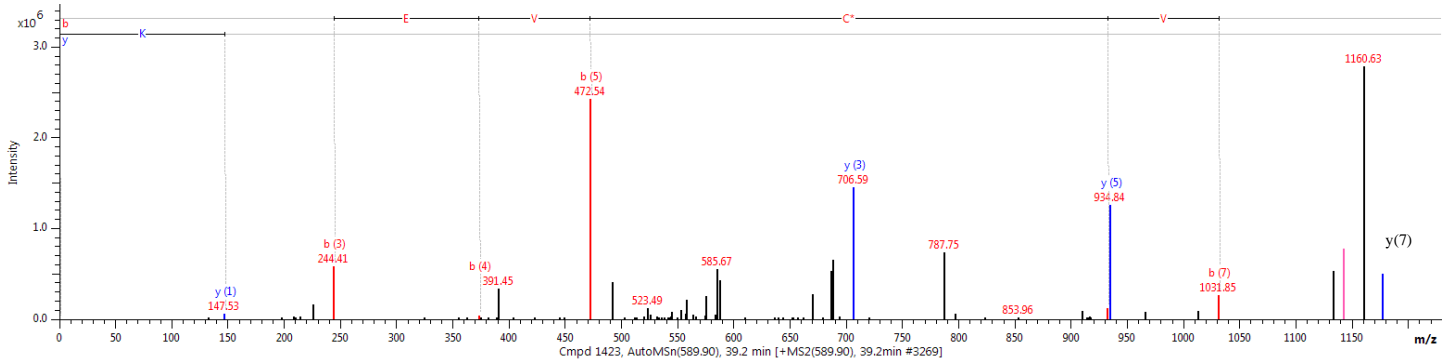

## 2. Mitochondrial ARL4-HNE adduct (KNPDSLELIR)

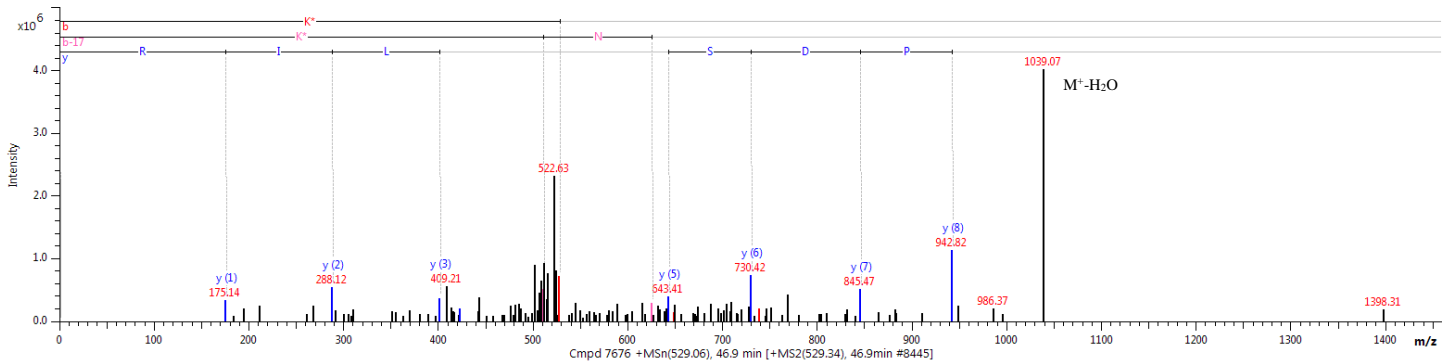

## 3. Cytosolic CE290 acrolein adduct (NLVDRLKSQLALK)

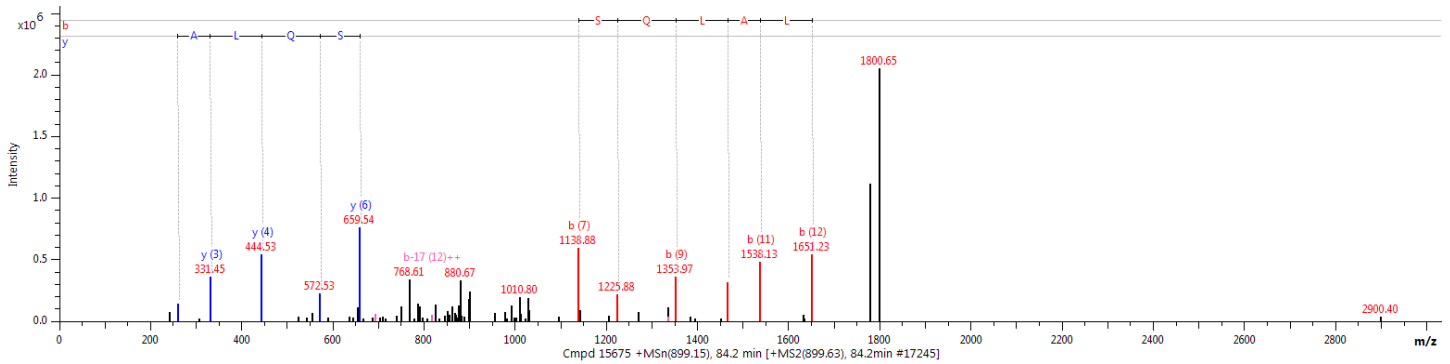

#### 4. Mitochondrial CP4AE 4-HNE adduct (DKELQQILIVVEK)

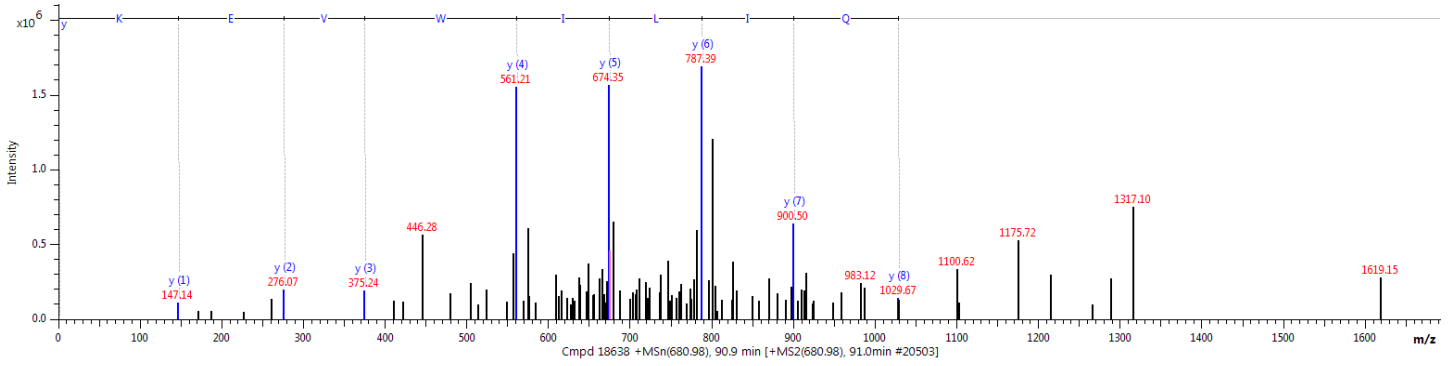

#### 5. Cytosolic HSP7C nonenaldehyde adduct (LDKSQIHDIIVLGGSTR)

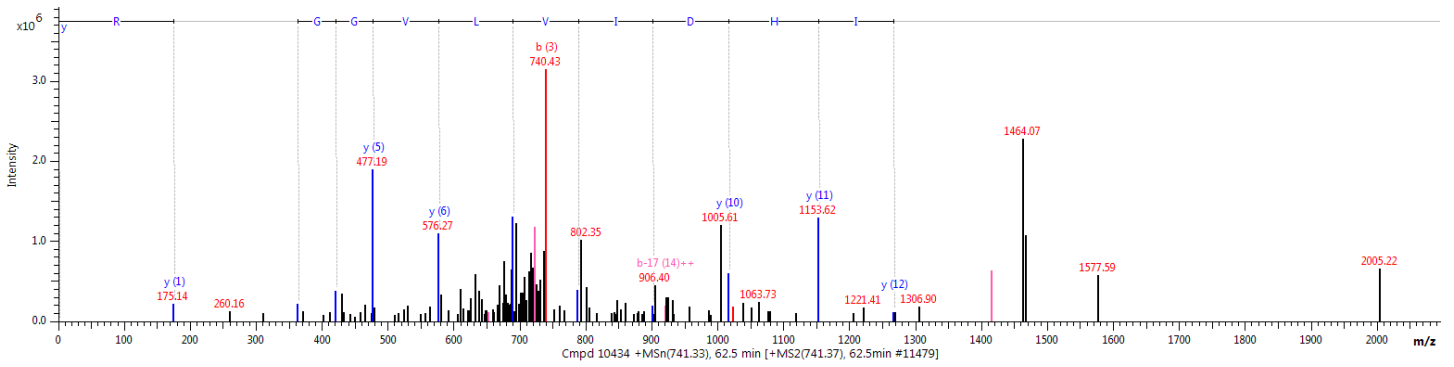

#### 6. Cytosolic IF5 4-HNE adduct (LDVKAMGPLVLTEVLFDEK)

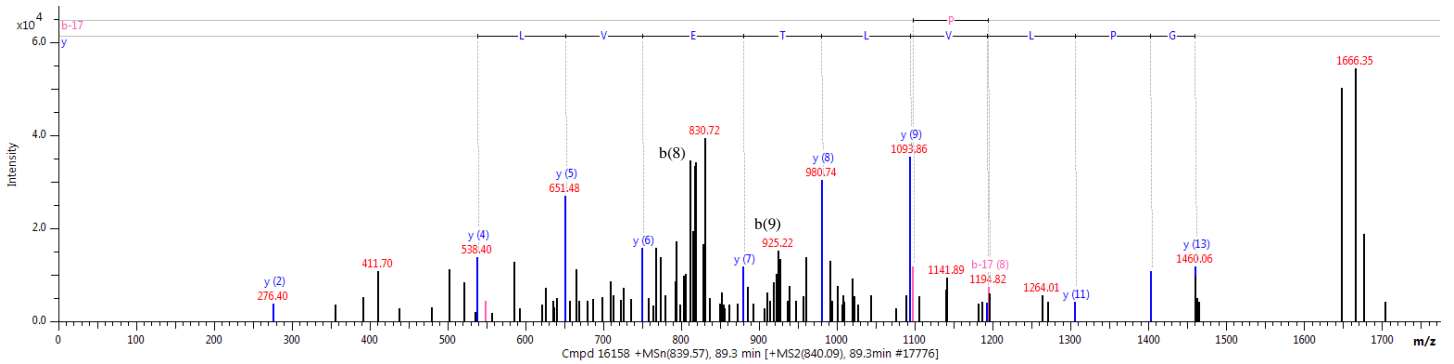

### 7. Mitochondrial MTP MDA adduct (ALLSKFK)

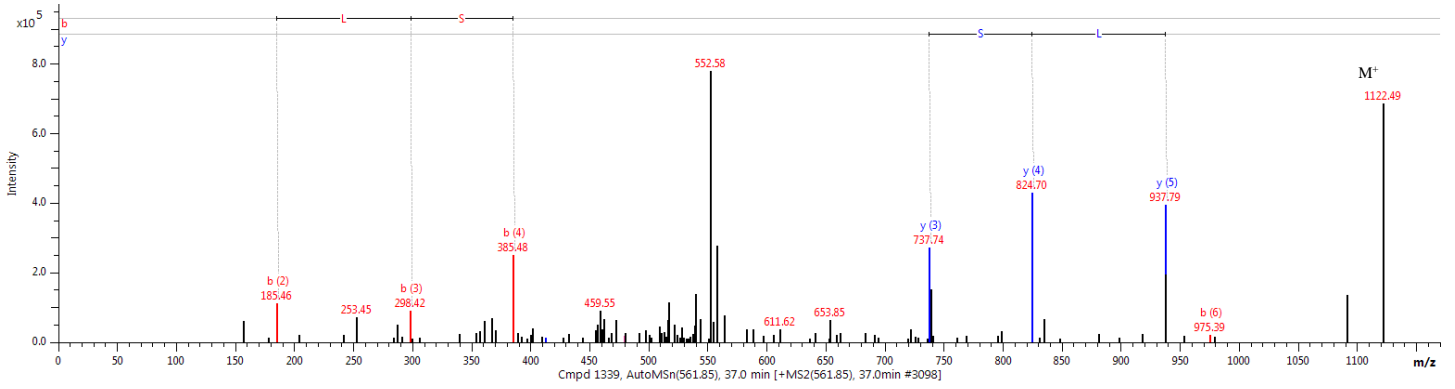

### 8. Cytosolic NU155 acrolein adduct (CRKINHSK)

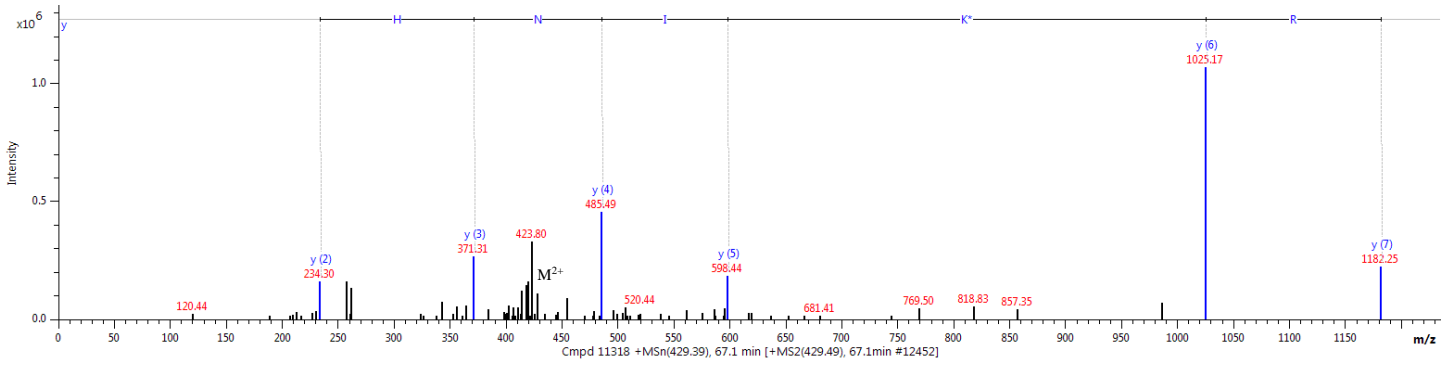

### 9. Mitochondrial OAT acrolein adduct (GKGLLNAIVR)

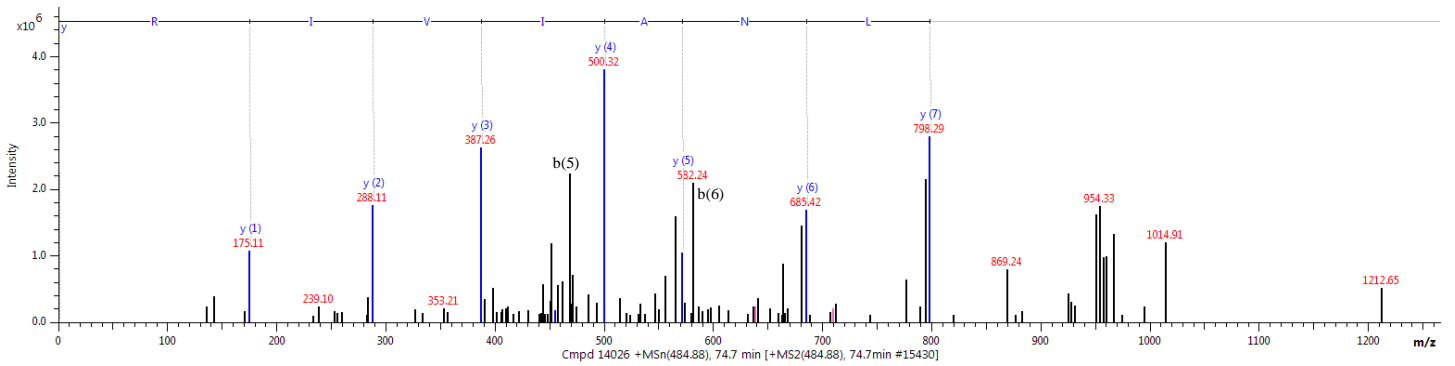



### 10. Mitochondrial SDHA HHE adduct (AKNTVIATGGYGR)

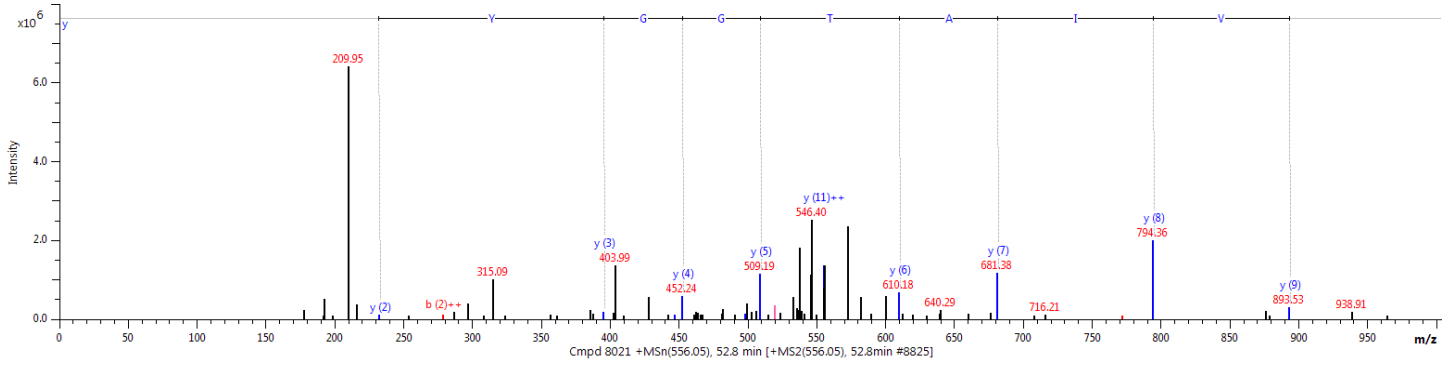

### 11. Cytosolic TBA4A octenaldehyde adduct (HVPRAVFVDLEPTVIDEIR)

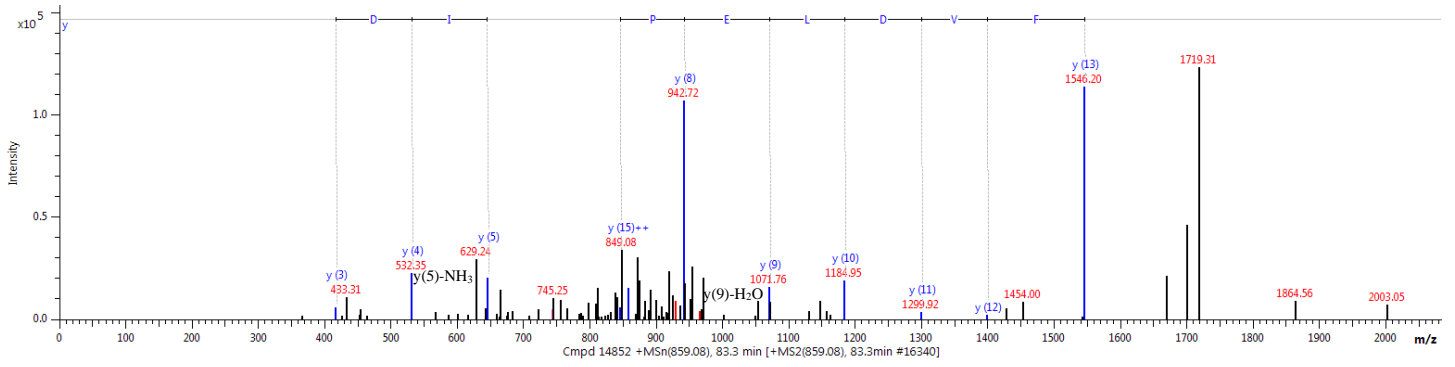

Supplement: mmc2.pdf [file mmc2.pdf]
